# Supplementary material
Source: publisher figshare collection journal article supplement (https://tandf.figshare.com/ndownloader/files/17208854)
Supplement: Supplementary file 1 [file 17208854]

**Supplementary Table 1. Median consumption (gram/day) of different food groups in the studied population**

| Median consumption           | Men        | Women       |
|------------------------------|------------|-------------|
| <i>n</i>                     | <i>772</i> | <i>1030</i> |
| (MUFA + PUFA): SFA           | 1.09       | 1.16        |
| Vegetables and potatoes, g/d | 197        | 208         |
| Fruit and berries, g/d       | 88.3       | 135         |
| Wholegrain cereals, g/d      | 63.5       | 56.4        |
| Fish products, g/d           | 20.1       | 16.8        |
| Meat products, g/d           | 76.8       | 56.0        |
| Dairy product, g/d           | 400.4      | 320.7       |
| Alcohol, g/d                 | 5.8        | 1.9         |

Abbreviations: MUFA, monounsaturated fat; PUFA, polyunsaturated fat; SFA, saturated fat

**Supplementary Table 2. Mediterranean diet score (MDS) and odds ratios (95% confidence intervals) for developing chronic obstructive pulmonary disease more than 10 years after the visit in the VIP among 243 individuals and 937 controls matched for age, sex, and smoking habit<sup>a</sup>**

|                      | Crude                   | Adjusted,<br>model 1 <sup>b</sup> | Adjusted,<br>model 2 <sup>c</sup> | Adjusted,<br>model 3 <sup>d</sup> | Adjusted,<br>model 4 <sup>e</sup> |
|----------------------|-------------------------|-----------------------------------|-----------------------------------|-----------------------------------|-----------------------------------|
| Cases (n)            | 243                     | 243                               | 242                               | 193                               | 192                               |
| <b>MDS</b>           |                         |                                   |                                   |                                   |                                   |
| Low adherence 0-2    | 1 (reference)           | 1 (reference)                     | 1 (reference)                     | 1 (reference)                     | 1 (reference)                     |
| Medium adherence 3-5 | <b>0.66 (0.47-0.90)</b> | <b>0.68 (0.50-0.95)</b>           | <b>0.69 (0.50-0.95)</b>           | 0.72 (0.49-1.05)                  | 0.78 (0.53-1.14)                  |
| High adherence 6-8   | <b>0.57 (0.34-0.95)</b> | 0.64 (0.38-1.07)                  | 0.66 (0.39-1.10)                  | 0.61 (0.33-1.13)                  | 0.72 (0.39-1.34)                  |

<sup>a</sup>Smoking status was defined at the time of examination in the Västerbotten Intervention Programme

<sup>b</sup>Adjusted for higher education

<sup>c</sup>Adjusted for higher education and living alone

<sup>d</sup>Adjusted for numbers of cigarettes smoked per day

<sup>e</sup>Adjusted for higher education, living alone, and numbers of cigarettes smoked per day
